# Supplementary material for: CuO nanorod arrays by gas-phase cation exchange for efficient photoelectrochemical water splitting
Source: Royal Society of Chemistry journal article supplement (doi:10.1039/d2ra07648a), 2023-01-01
Supplement: d2ra07648a1.pdf [file d2ra07648a1.pdf]

Supporting Information

# CuO Nanorod Arrays by Gas-phase Cation Exchange for Efficient Photoelectrochemical Water Splitting

Zhi Zheng,<sup>1,2,3</sup> Mikhail Morgan,<sup>2</sup> Pramathesh Maji,<sup>2</sup> Xia Xiang,<sup>1,3</sup> Xiaotao Zu<sup>1,3</sup> and Weilie Zhou<sup>2</sup>

<sup>1</sup> Yangtze Delta Region Institute (Huzhou), University of Electronic Science and Technology of China, Huzhou 313001, P. R. China.

<sup>2</sup> Department of Physics and Advanced Materials Research Institute, University of New Orleans, New Orleans, LA 70148, United States.

<sup>3</sup> School of Physics, University of Electronic Science and Technology of China, Chengdu 611731, P. R. China.

Author to whom correspondence should be addressed: [xtzu@uestc.edu.cn](mailto:xtzu@uestc.edu.cn) and [wzhou@uno.edu](mailto:wzhou@uno.edu)

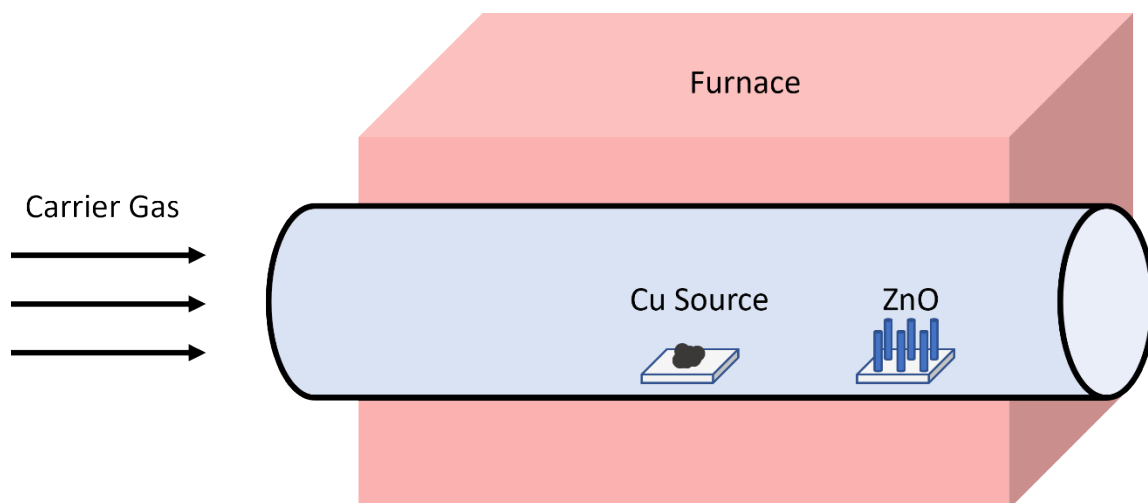

Figure S1. The schematic representation of the experimental setup for the gas-phase cation exchange.

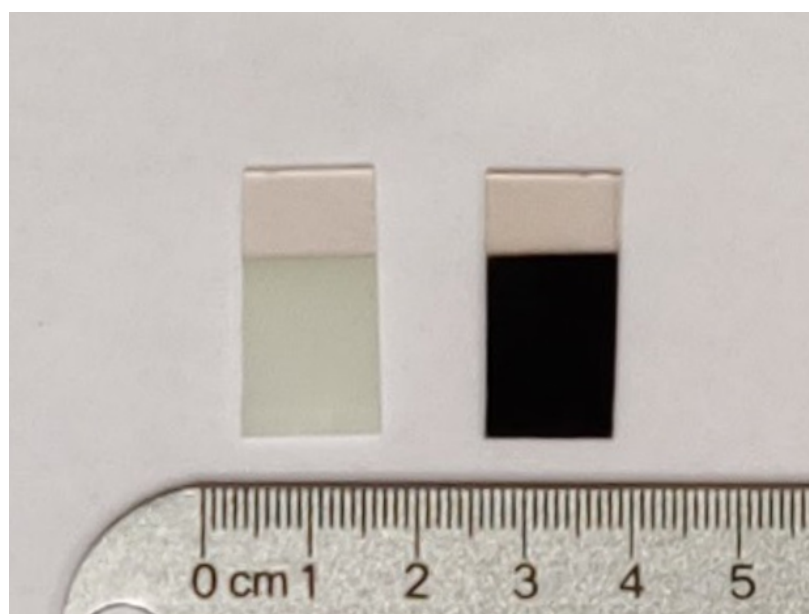

Figure S2. Photography of the ZnO nanorod arrays on ITO glass before (left) and after (right) the cation exchange reaction, showing the color change after the gas-phase cation exchange reaction.

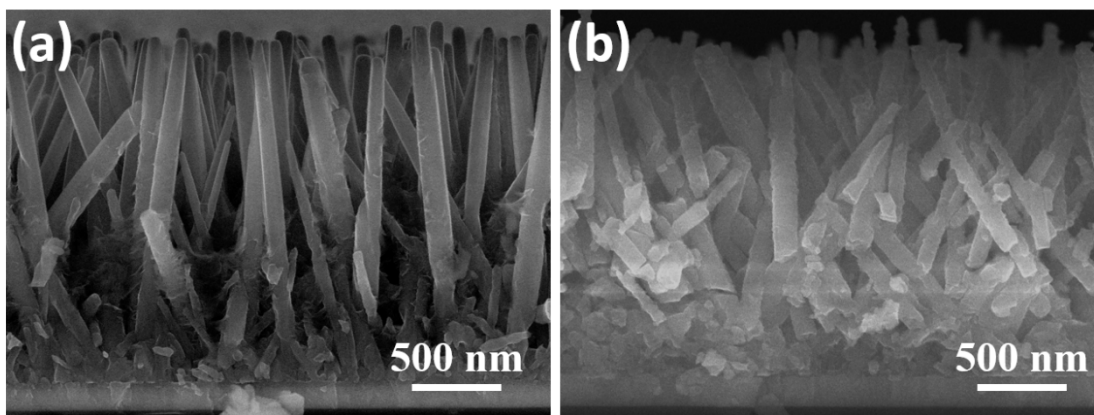

Figure S3. Cross-sectional SEM images of (a) ZnO and (b) CuO nanorod arrays, demonstrating the well preserves of the nanorod structures.

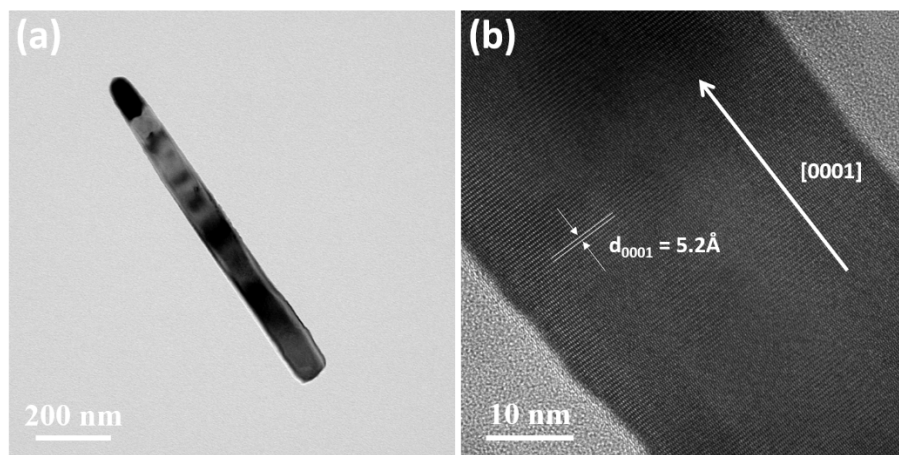

Figure S4. (a) Low-magnification and (b) HRTEM of a typical ZnO nanorod.

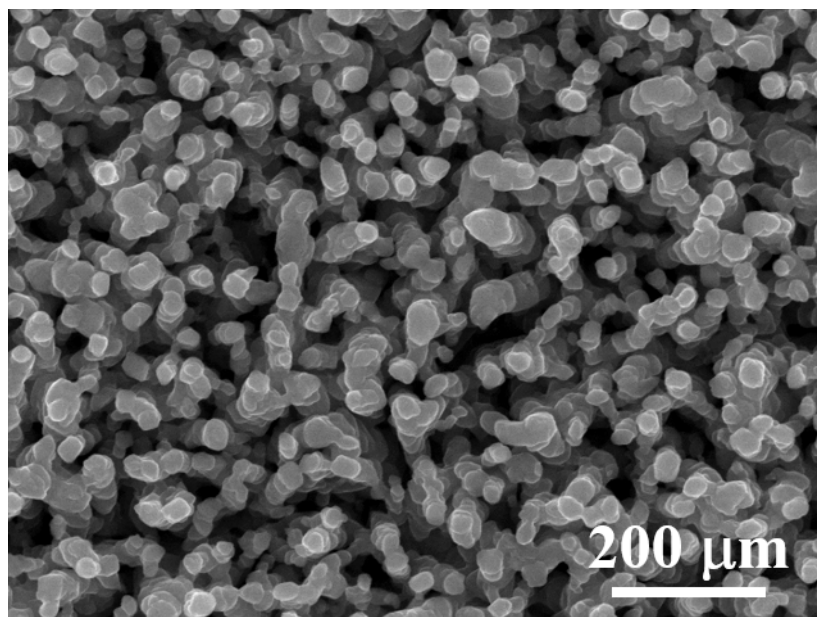

Figure S5. The SEM image of the sample under 650 °C gas-phase cation exchange, indicates the deterioration of the nanostructures.

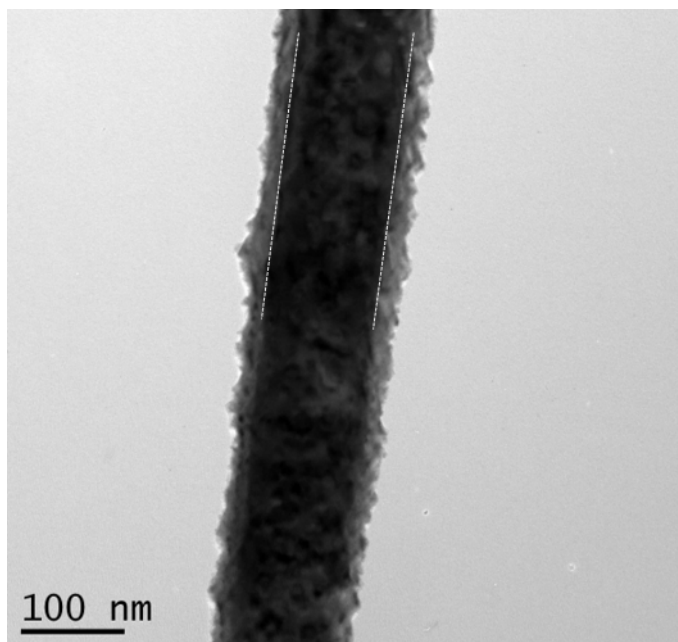

Figure S6. The TEM image of nanorod under 300 °C gas-phase cation exchange. A clear interface can be observed, revealing the partial cation exchange.

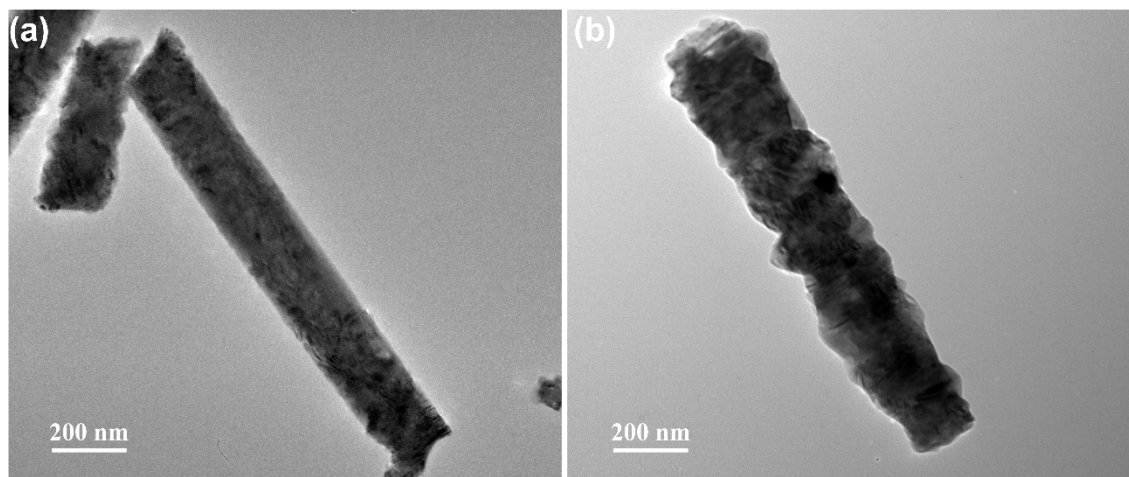

Figure S7. The TEM image of nanorod under (a) 400 and (b) 500 °C.

Table S1. The fitted parameters based on the EIS measurements under different reaction temperatures.

| Reaction temperature (°C) | Photocurrent (mA/cm <sup>2</sup> ) | R <sub>ct</sub> (Ω) | R <sub>s</sub> (Ω) |
|---------------------------|------------------------------------|---------------------|--------------------|
| 350                       | 1.53                               | 52.51               | 88.86              |
| 400                       | 2.01                               | 14.47               | 57.41              |
| 450                       | 2.1                                | 4.777               | 47.13              |
| 500                       | 0.99                               | 52.78               | 32.79              |
